# Supplementary material for: Cost-effectiveness analysis of treatment of venous thromboembolism with rivaroxaban compared with combined low molecular weight heparin/vitamin K antagonist
Source: Springer Nature journal article supplement (doi:10.1186/s12959-015-0051-3), 2015-04-16
Supplement: MOESM2 [file 9765632]

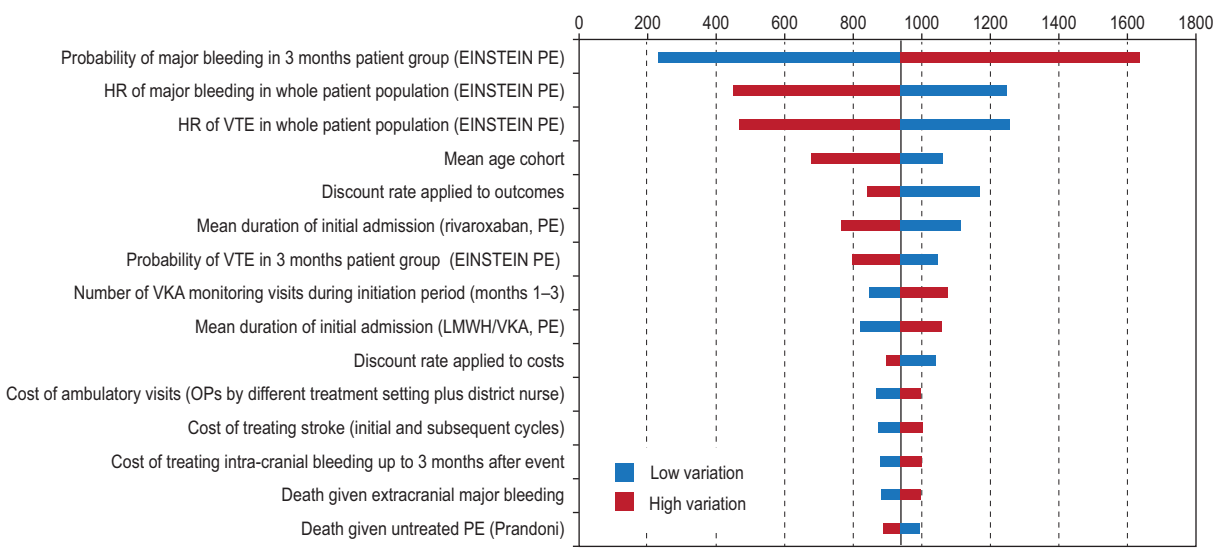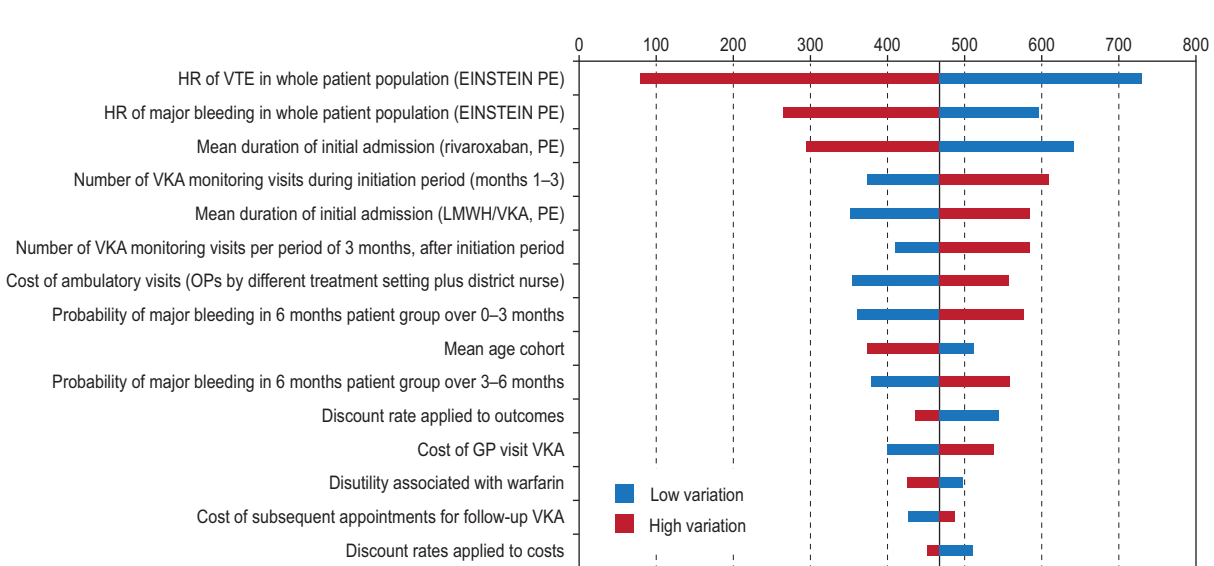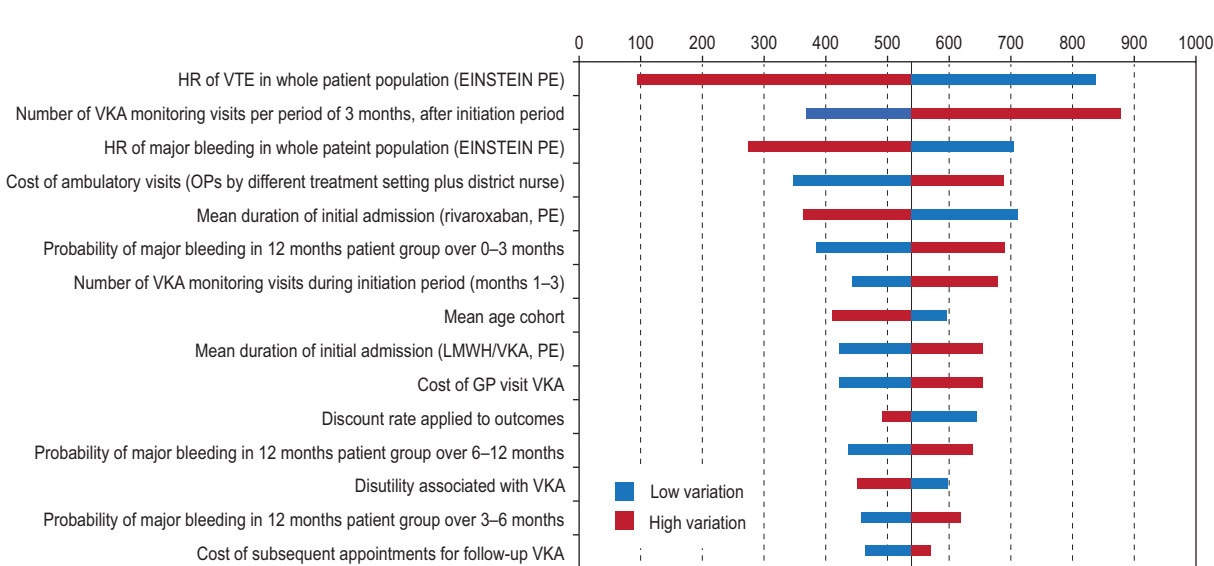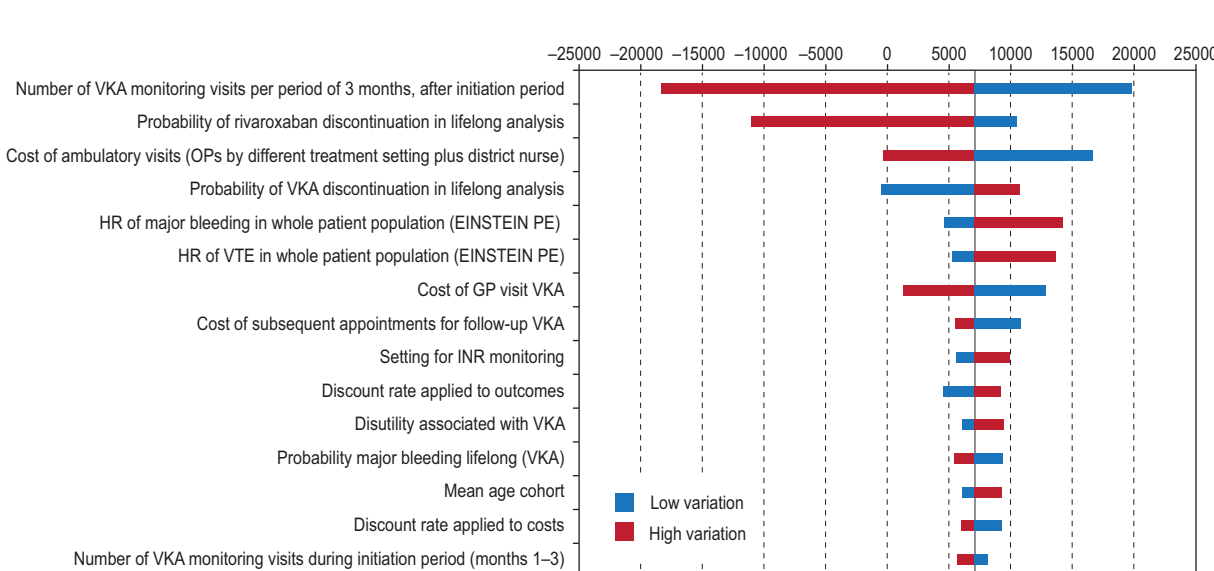

**Figure S2** OWSA Tornado diagram of net monetary benefit of rivaroxaban versus LMWH/VKA for the treatment of PE – QALY based: 1 vs 2 (lifetime). Patients requiring 3 months (a), 6 months (b), 12 months (c), and lifelong anticoagulation (d). GP, general practitioner; HR, hazard ratio; LMWH, low molecular weight heparin; OP, outpatient; OWSA, one-way sensitivity analysis; PE, pulmonary embolism; QALY, quality-adjusted life-year; VKA, vitamin K antagonist; VTE, venous thromboembolism.
